# Supplementary material for: Type 2 diabetes: an exploratory genetic association analysis of selected metabolizing enzymes and transporters and effects on cardiovascular and renal biomarkers
Source: publisher site journal article supplement (doi:10.1515/dmpt-2021-0135), 2022-06-24

**T-Test**

| **Notes** | | |
| --- | --- | --- |
| Output Created | | 22-FEB-2022 12:17:19 |
| Comments | |  |
| Input | Data | C:\Users\harirfor.ETSU\Desktop\Diabetes data_042219.sav |
| Active Dataset | DataSet1 |
| Filter | <none> |
| Weight | <none> |
| Split File | <none> |
| N of Rows in Working Data File | 63 |
| Missing Value Handling | Definition of Missing | User defined missing values are treated as missing. |
| Cases Used | Statistics for each analysis are based on the cases with no missing or out-of-range data for any variable in the analysis. |
| Syntax | | T-TEST GROUPS=DiseaseState(1 2) /MISSING=ANALYSIS /VARIABLES=ADMA_CON_umolL KIM1_ngml /ES DISPLAY(TRUE) /CRITERIA=CI(.95). |
| Resources | Processor Time | 00:00:00.00 |
| Elapsed Time | 00:00:00.01 |

| **Group Statistics** | | | | | |
| --- | --- | --- | --- | --- | --- |
|  | Disease State | N | Mean | Std. Deviation | Std. Error Mean |
| ADMA_CON_umolL | healthy | 31 | 1.8287 | 1.40827 | .25293 |
| T2D | 30 | 1.8972 | 1.81938 | .33217 |
| KIM-1 | healthy | 22 | 1.8179 | 1.79295 | .38226 |
| T2D | 14 | 2.5306 | 1.86857 | .49940 |

| **Independent Samples Test** | | | | | |
| --- | --- | --- | --- | --- | --- |
|  | | Levene's Test for Equality of Variances | | t-test for Equality of Means | |
| F | Sig. | t | df |
|
| ADMA_CON_umolL | Equal variances assumed | .522 | .473 | -.165 | 59 |
| Equal variances not assumed |  |  | -.164 | 54.626 |
| KIM-1 | Equal variances assumed | .002 | .964 | -1.144 | 34 |
| Equal variances not assumed |  |  | -1.133 | 26.966 |

| **Independent Samples Test** | | | | |
| --- | --- | --- | --- | --- |
|  | | t-test for Equality of Means | | |
| Significance | | Mean Difference |
| One-Sided p | Two-Sided p |
| ADMA_CON_umolL | Equal variances assumed | .435 | .870 | -.06855 |
| Equal variances not assumed | .435 | .870 | -.06855 |
| KIM-1 | Equal variances assumed | .130 | .261 | -.71273 |
| Equal variances not assumed | .134 | .267 | -.71273 |

| **Independent Samples Test** | | | | |
| --- | --- | --- | --- | --- |
|  | | t-test for Equality of Means | | |
| Std. Error Difference | 95% Confidence Interval of the Difference | |
| Lower | Upper |
| ADMA_CON_umolL | Equal variances assumed | .41577 | -.90050 | .76340 |
| Equal variances not assumed | .41751 | -.90538 | .76828 |
| KIM-1 | Equal variances assumed | .62299 | -1.97880 | .55334 |
| Equal variances not assumed | .62890 | -2.00321 | .57775 |

| **Independent Samples Effect Sizes** | | | | | |
| --- | --- | --- | --- | --- | --- |
|  | | Standardizera | Point Estimate | 95% Confidence Interval | |
| Lower | Upper |
| ADMA_CON_umolL | Cohen's d | 1.62340 | -.042 | -.544 | .460 |
| Hedges' correction | 1.64441 | -.042 | -.537 | .454 |
| Glass's delta | 1.81938 | -.038 | -.539 | .465 |
| KIM-1 | Cohen's d | 1.82224 | -.391 | -1.065 | .288 |
| Hedges' correction | 1.86370 | -.382 | -1.041 | .282 |
| Glass's delta | 1.86857 | -.381 | -1.060 | .311 |
| a. The denominator used in estimating the effect sizes. Cohen's d uses the pooled standard deviation. Hedges' correction uses the pooled standard deviation, plus a correction factor. Glass's delta uses the sample standard deviation of the control group. | | | | | |

**Regression**

| **Notes** | | |
| --- | --- | --- |
| Output Created | | 22-FEB-2022 12:40:05 |
| Comments | |  |
| Input | Data | C:\Users\harirfor.ETSU\Desktop\Diabetes data_042219.sav |
| Active Dataset | DataSet1 |
| Filter | <none> |
| Weight | <none> |
| Split File | <none> |
| N of Rows in Working Data File | 63 |
| Missing Value Handling | Definition of Missing | User-defined missing values are treated as missing. |
| Cases Used | Statistics are based on cases with no missing values for any variable used. |
| Syntax | | REGRESSION /MISSING LISTWISE /STATISTICS COEFF OUTS CI(95) R ANOVA COLLIN TOL CHANGE /CRITERIA=PIN(.05) POUT(.10) /NOORIGIN /DEPENDENT KIM1_ngml /METHOD=ENTER Gender Age DiseaseState Race /SCATTERPLOT=(KIM1_ngml ,*ZPRED) (*ZRESID ,KIM1_ngml) (*ZRESID ,*ZPRED) /RESIDUALS DURBIN HISTOGRAM(ZRESID) NORMPROB(ZRESID). |
| Resources | Processor Time | 00:00:03.95 |
| Elapsed Time | 00:00:01.57 |
| Memory Required | 4192 bytes |
| Additional Memory Required for Residual Plots | 1360 bytes |

| **Variables Entered/Removed**a | | | |
| --- | --- | --- | --- |
| Model | Variables Entered | Variables Removed | Method |
| 1 | Race , Age , Disease State, Genderb | . | Enter |
| a. Dependent Variable: KIM-1 | | | |
| b. All requested variables entered. | | | |

| **Model Summary**b | | | | | | | |
| --- | --- | --- | --- | --- | --- | --- | --- |
| Model | R | R Square | Adjusted R Square | Std. Error of the Estimate | Change Statistics | | |
| R Square Change | F Change | df1 |
| 1 | .413a | .171 | .063 | 1.77122 | .171 | 1.593 | 4 |

| **Model Summary**b | | | | | |
| --- | --- | --- | --- | --- | --- |
| Model | Change Statistics | | | Durbin-Watson | |
| df2 | Sig. F Change | |
| 1 | 31 | .201 | | 1.521 | |
|  |  |  |  | |  | |  |  |  |
|  |  |  |  | |  | |  |  |  |

| a. Predictors: (Constant), Race , Age , Disease State, Gender |
| --- |
| b. Dependent Variable: KIM-1 |

| **ANOVA**a | | | | | | |
| --- | --- | --- | --- | --- | --- | --- |
| Model | | Sum of Squares | df | Mean Square | F | Sig. |
| 1 | Regression | 19.991 | 4 | 4.998 | 1.593 | .201b |
| Residual | 97.254 | 31 | 3.137 |  |  |
| Total | 117.245 | 35 |  |  |  |
| a. Dependent Variable: KIM-1 | | | | | | |
| b. Predictors: (Constant), Race , Age , Disease State, Gender | | | | | | |

| **Coefficients**a | | | | | | |
| --- | --- | --- | --- | --- | --- | --- |
| Model | | Unstandardized Coefficients | | Standardized Coefficients | t | Sig. |
| B | Std. Error | Beta |
| 1 | (Constant) | -.461 | 2.958 |  | -.156 | .877 |
| Gender | 1.476 | .709 | .409 | 2.081 | .046 |
| Age | .021 | .028 | .137 | .749 | .460 |
| Disease State | .164 | .654 | .044 | .250 | .804 |
| Race | -.812 | 1.838 | -.074 | -.442 | .662 |

| **Coefficients**a | | | | | | | | |
| --- | --- | --- | --- | --- | --- | --- | --- | --- |
| Model | | 95.0% Confidence Interval for B | | | | Collinearity Statistics | | |
| Lower Bound | | Upper Bound | | Tolerance | VIF | |
| 1 | (Constant) | -6.494 | | 5.573 | |  |  | |
| Gender | .030 | | 2.922 | | .693 | 1.442 | |
| Age | -.036 | | .077 | | .798 | 1.253 | |
| Disease State | -1.170 | | 1.497 | | .858 | 1.165 | |
| Race | -4.560 | | 2.936 | | .955 | 1.047 | |
|  |  |  |  | |  | | |  | |  |

| a. Dependent Variable: KIM-1 |
| --- |

| **Collinearity Diagnostics**a | | | | | | | |
| --- | --- | --- | --- | --- | --- | --- | --- |
| Model | Dimension | Eigenvalue | Condition Index | Variance Proportions | | | |
| (Constant) | Gender | Age | Disease State |
| 1 | 1 | 4.754 | 1.000 | .00 | .00 | .00 | .00 |
| 2 | .129 | 6.080 | .00 | .22 | .15 | .11 |
| 3 | .075 | 7.981 | .00 | .20 | .02 | .78 |
| 4 | .036 | 11.534 | .00 | .30 | .51 | .09 |
| 5 | .007 | 25.593 | .99 | .27 | .32 | .01 |

| **Collinearity Diagnostics**a | | |
| --- | --- | --- |
| Model | Dimension | Variance Proportions |
| Race |
| 1 | 1 | .00 |
| 2 | .01 |
| 3 | .03 |
| 4 | .29 |
| 5 | .67 |
|  |  |  | |  |  |  |  |  |

| a. Dependent Variable: KIM-1 |
| --- |

| **Residuals Statistics**a | | | | | |
| --- | --- | --- | --- | --- | --- |
|  | Minimum | Maximum | Mean | Std. Deviation | N |
| Predicted Value | .4642 | 3.3491 | 2.0951 | .75576 | 36 |
| Residual | -2.76850 | 3.49815 | .00000 | 1.66694 | 36 |
| Std. Predicted Value | -2.158 | 1.659 | .000 | 1.000 | 36 |
| Std. Residual | -1.563 | 1.975 | .000 | .941 | 36 |
| a. Dependent Variable: KIM-1 | | | | | |

**Charts**


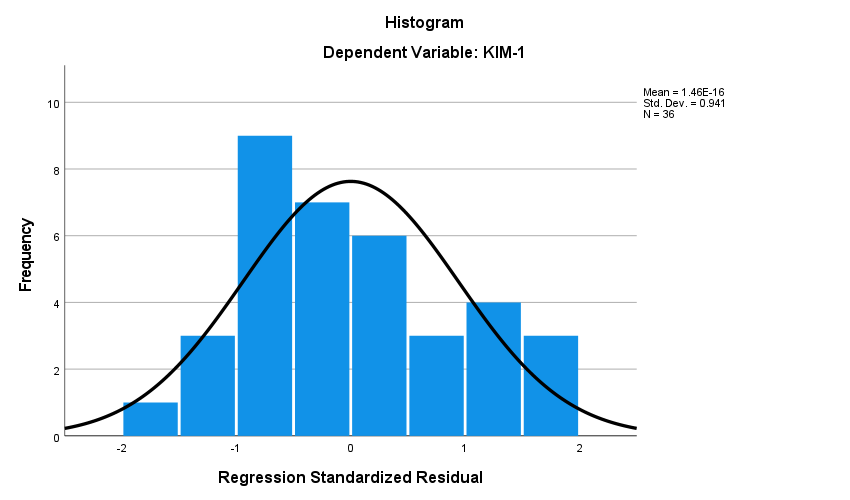


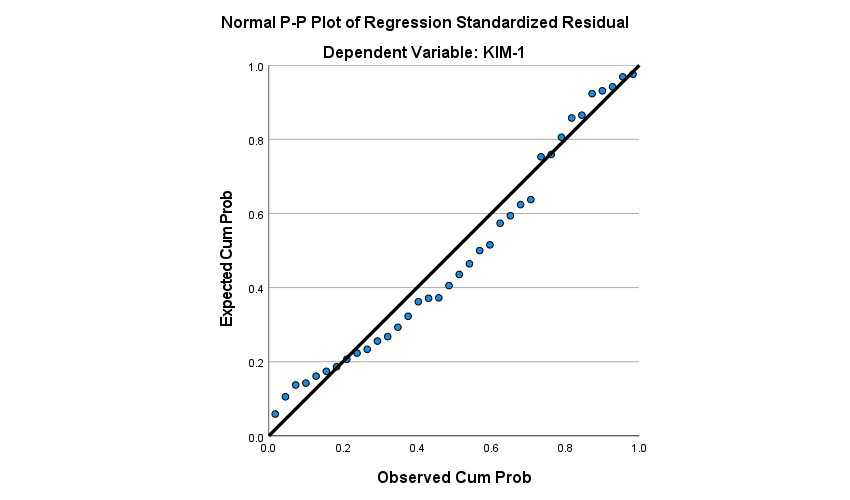


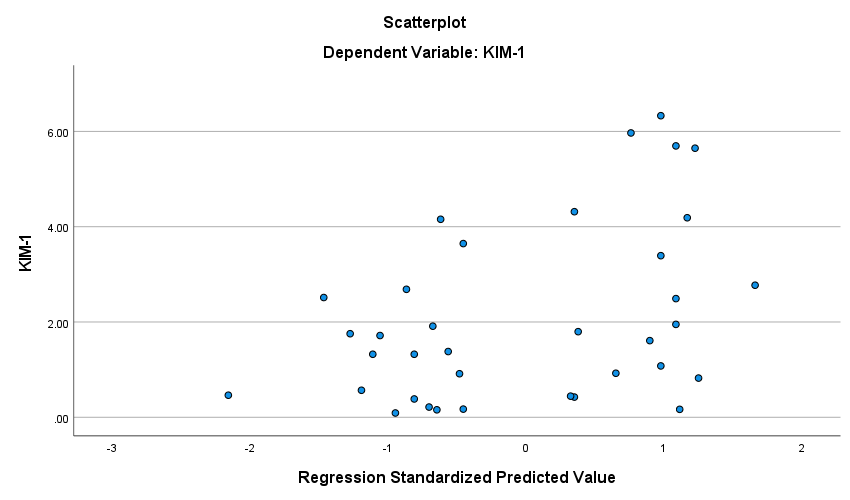


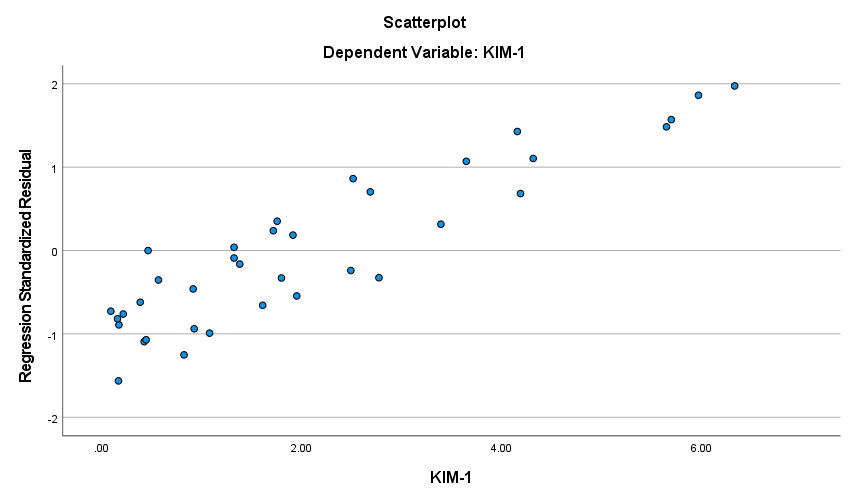


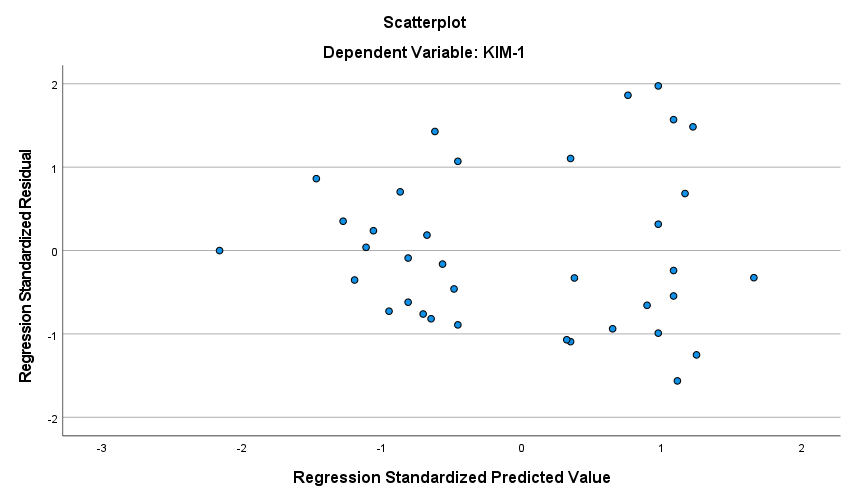


**Regression**

| **Notes** | | |
| --- | --- | --- |
| Output Created | | 22-FEB-2022 12:43:40 |
| Comments | |  |
| Input | Data | C:\Users\harirfor.ETSU\Desktop\Diabetes data_042219.sav |
| Active Dataset | DataSet1 |
| Filter | <none> |
| Weight | <none> |
| Split File | <none> |
| N of Rows in Working Data File | 63 |
| Missing Value Handling | Definition of Missing | User-defined missing values are treated as missing. |
| Cases Used | Statistics are based on cases with no missing values for any variable used. |
| Syntax | | REGRESSION /MISSING LISTWISE /STATISTICS COEFF OUTS CI(95) R ANOVA COLLIN TOL CHANGE /CRITERIA=PIN(.05) POUT(.10) /NOORIGIN /DEPENDENT ADMA_CON_umolL /METHOD=ENTER Gender Age DiseaseState Race /SCATTERPLOT=(ADMA_CON_umolL ,*ZPRED) (*ZRESID ,ADMA_CON_umolL) (*ZRESID ,*ZPRED) /RESIDUALS DURBIN HISTOGRAM(ZRESID) NORMPROB(ZRESID). |
| Resources | Processor Time | 00:00:01.84 |
| Elapsed Time | 00:00:00.60 |
| Memory Required | 4192 bytes |
| Additional Memory Required for Residual Plots | 1360 bytes |

| **Variables Entered/Removed**a | | | |
| --- | --- | --- | --- |
| Model | Variables Entered | Variables Removed | Method |
| 1 | Race , Age , Disease State, Genderb | . | Enter |
| a. Dependent Variable: ADMA_CON_umolL | | | |
| b. All requested variables entered. | | | |

| **Model Summary**b | | | | | | | |
| --- | --- | --- | --- | --- | --- | --- | --- |
| Model | R | R Square | Adjusted R Square | Std. Error of the Estimate | Change Statistics | | |
| R Square Change | F Change | df1 |
| 1 | .405a | .164 | .104 | 1.52402 | .164 | 2.744 | 4 |

| **Model Summary**b | | | | | |
| --- | --- | --- | --- | --- | --- |
| Model | Change Statistics | | | Durbin-Watson | |
| df2 | Sig. F Change | |
| 1 | 56 | .037 | | 1.732 | |
|  |  |  |  | |  | |  |  |  |
|  |  |  |  | |  | |  |  |  |

| a. Predictors: (Constant), Race , Age , Disease State, Gender |
| --- |
| b. Dependent Variable: ADMA_CON_umolL |

| **ANOVA**a | | | | | | |
| --- | --- | --- | --- | --- | --- | --- |
| Model | | Sum of Squares | df | Mean Square | F | Sig. |
| 1 | Regression | 25.495 | 4 | 6.374 | 2.744 | .037b |
| Residual | 130.067 | 56 | 2.323 |  |  |
| Total | 155.562 | 60 |  |  |  |
| a. Dependent Variable: ADMA_CON_umolL | | | | | | |
| b. Predictors: (Constant), Race , Age , Disease State, Gender | | | | | | |

| **Coefficients**a | | | | | | |
| --- | --- | --- | --- | --- | --- | --- |
| Model | | Unstandardized Coefficients | | Standardized Coefficients | t | Sig. |
| B | Std. Error | Beta |
| 1 | (Constant) | 5.060 | 2.064 |  | 2.452 | .017 |
| Gender | -.147 | .433 | -.045 | -.340 | .735 |
| Age | -.055 | .017 | -.412 | -3.190 | .002 |
| Disease State | .145 | .405 | .045 | .359 | .721 |
| Race | -.768 | 1.554 | -.061 | -.494 | .623 |

| **Coefficients**a | | | | | | | | |
| --- | --- | --- | --- | --- | --- | --- | --- | --- |
| Model | | 95.0% Confidence Interval for B | | | | Collinearity Statistics | | |
| Lower Bound | | Upper Bound | | Tolerance | VIF | |
| 1 | (Constant) | .926 | | 9.193 | |  |  | |
| Gender | -1.015 | | .721 | | .849 | 1.177 | |
| Age | -.090 | | -.021 | | .893 | 1.120 | |
| Disease State | -.666 | | .957 | | .928 | 1.077 | |
| Race | -3.881 | | 2.346 | | .977 | 1.023 | |
|  |  |  |  | |  | | |  | |  |

| a. Dependent Variable: ADMA_CON_umolL |
| --- |

| **Collinearity Diagnostics**a | | | | | | | |
| --- | --- | --- | --- | --- | --- | --- | --- |
| Model | Dimension | Eigenvalue | Condition Index | Variance Proportions | | | |
| (Constant) | Gender | Age | Disease State |
| 1 | 1 | 4.759 | 1.000 | .00 | .00 | .00 | .00 |
| 2 | .120 | 6.301 | .00 | .44 | .19 | .02 |
| 3 | .078 | 7.790 | .00 | .13 | .01 | .93 |
| 4 | .036 | 11.462 | .02 | .32 | .69 | .01 |
| 5 | .006 | 28.217 | .97 | .11 | .11 | .05 |

| **Collinearity Diagnostics**a | | |
| --- | --- | --- |
| Model | Dimension | Variance Proportions |
| Race |
| 1 | 1 | .00 |
| 2 | .00 |
| 3 | .01 |
| 4 | .15 |
| 5 | .83 |
|  |  |  | |  |  |  |  |  |

| a. Dependent Variable: ADMA_CON_umolL |
| --- |

| **Residuals Statistics**a | | | | | |
| --- | --- | --- | --- | --- | --- |
|  | Minimum | Maximum | Mean | Std. Deviation | N |
| Predicted Value | .5906 | 3.3310 | 1.8624 | .65186 | 61 |
| Residual | -1.83551 | 6.69140 | .00000 | 1.47234 | 61 |
| Std. Predicted Value | -1.951 | 2.253 | .000 | 1.000 | 61 |
| Std. Residual | -1.204 | 4.391 | .000 | .966 | 61 |
| a. Dependent Variable: ADMA_CON_umolL | | | | | |

**Charts**


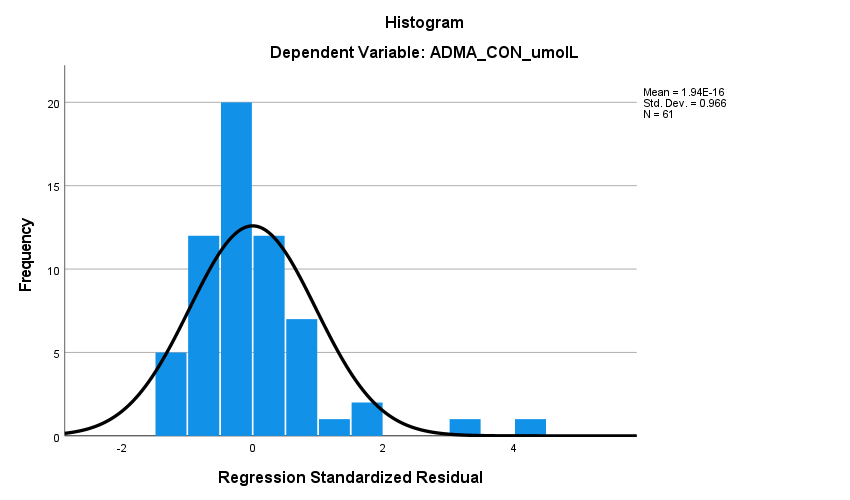


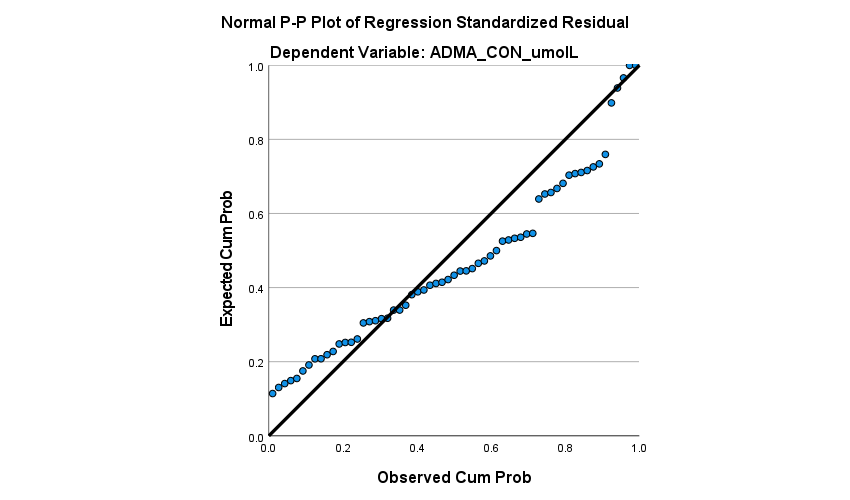


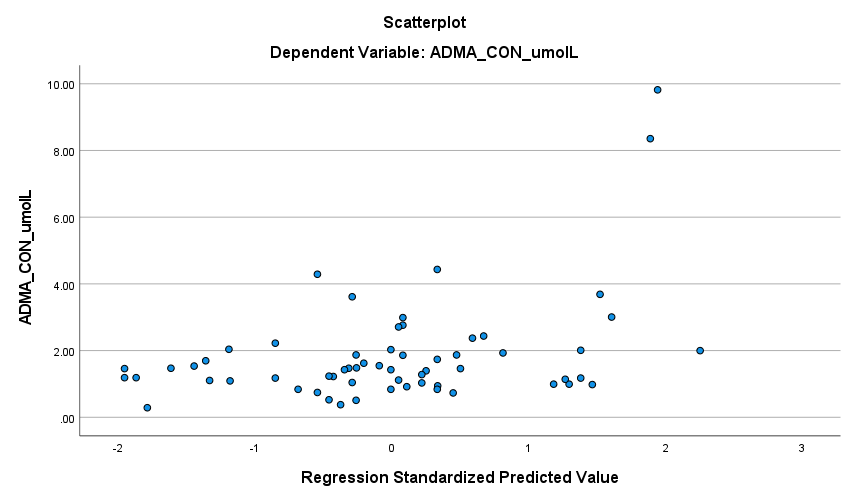


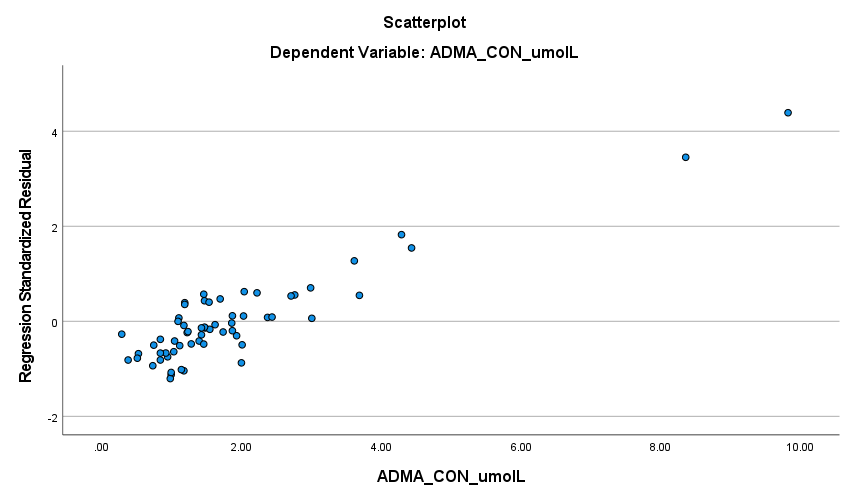


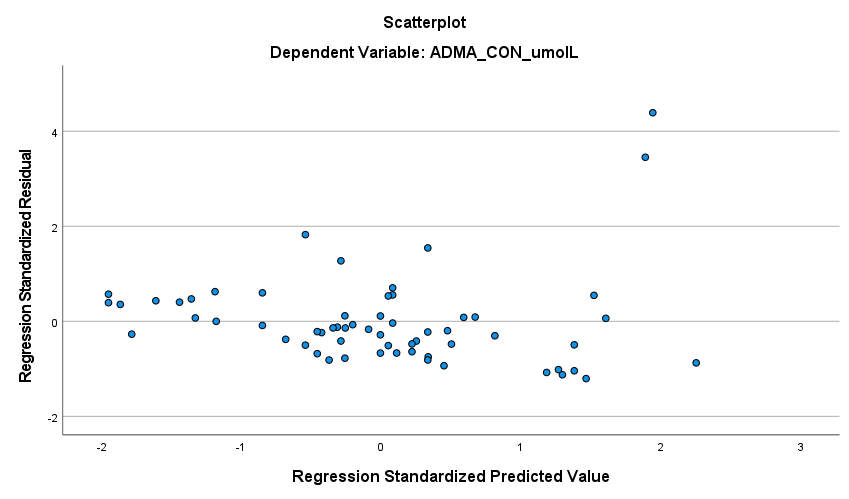

Supplement: Supplementary file 1 [file j_dmpt-2021-0135_suppl_001.docx]
