# Supplementary material for: Type 2 diabetes: an exploratory genetic association analysis of selected metabolizing enzymes and transporters and effects on cardiovascular and renal biomarkers
Source: publisher site journal article supplement (doi:10.1515/dmpt-2021-0135), 2022-06-24

**Nonparametric Tests**

| **Notes** | | |
| --- | --- | --- |
| Output Created | | 22-FEB-2022 17:27:45 |
| Comments | |  |
| Input | Data | C:\Users\harirfor.ETSU\Desktop\V2\Statistics\Diabetes data_042219.sav |
| Active Dataset | DataSet1 |
| Filter | <none> |
| Weight | <none> |
| Split File | <none> |
| N of Rows in Working Data File | 63 |
| Syntax | | NPTESTS /INDEPENDENT TEST (KIM1_ngml ADMA_CON_umolL) GROUP (DiseaseState) /MISSING SCOPE=ANALYSIS USERMISSING=EXCLUDE /CRITERIA ALPHA=0.05 CILEVEL=95. |
| Resources | Processor Time | 00:00:01.00 |
| Elapsed Time | 00:00:01.03 |

[DataSet1] C:\Users\harirfor.ETSU\Desktop\V2\Statistics\Diabetes data_042219.sav

| **Hypothesis Test Summary** | | | |
| --- | --- | --- | --- |
|  | Null Hypothesis | Test | Sig.a,b |
| 1 | The distribution of KIM-1 is the same across categories of Disease State. | Independent-Samples Mann-Whitney U Test | .160c |
| 2 | The distribution of ADMA_CON_umolL is the same across categories of Disease State. | Independent-Samples Mann-Whitney U Test | .735 |

| **Hypothesis Test Summary** | |
| --- | --- |
|  | Decision |
| 1 | Retain the null hypothesis. |
| 2 | Retain the null hypothesis. |
|  |  | |  |  |
|  |  | |  |  |
|  |  | |  |  |

| a. The significance level is .050. |
| --- |
| b. Asymptotic significance is displayed. |
| c. Exact significance is displayed for this test. |

**Independent-Samples Mann-Whitney U Test**

**KIM-1 across Disease State**

| **Independent-Samples Mann-Whitney U Test Summary** | |
| --- | --- |
| Total N | 36 |
| Mann-Whitney U | 198.000 |
| Wilcoxon W | 303.000 |
| Test Statistic | 198.000 |
| Standard Error | 30.815 |
| Standardized Test Statistic | 1.428 |
| Asymptotic Sig.(2-sided test) | .153 |
| Exact Sig.(2-sided test) | .160 |


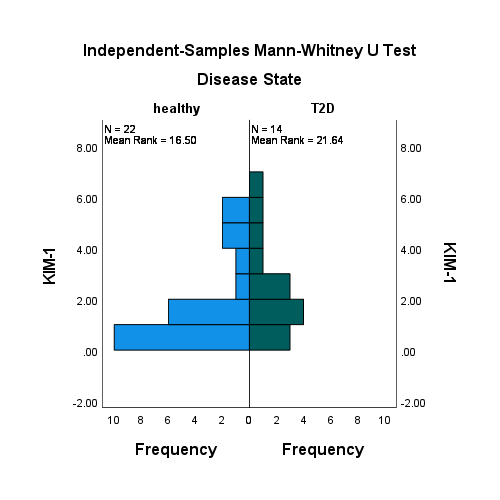


**ADMA_CON_umolL across Disease State**

| **Independent-Samples Mann-Whitney U Test Summary** | |
| --- | --- |
| Total N | 61 |
| Mann-Whitney U | 441.500 |
| Wilcoxon W | 906.500 |
| Test Statistic | 441.500 |
| Standard Error | 69.308 |
| Standardized Test Statistic | -.339 |
| Asymptotic Sig.(2-sided test) | .735 |


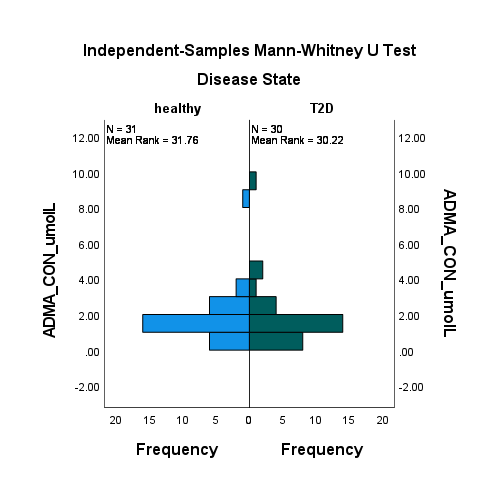


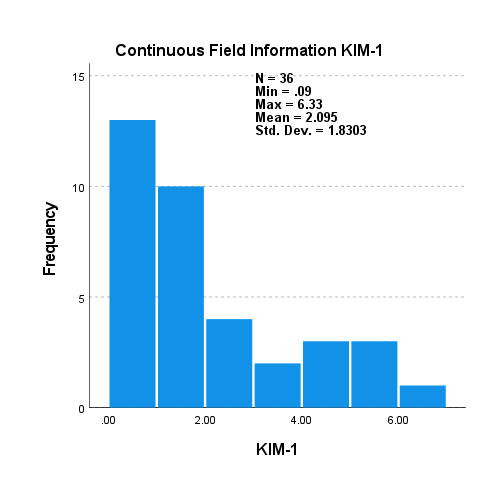


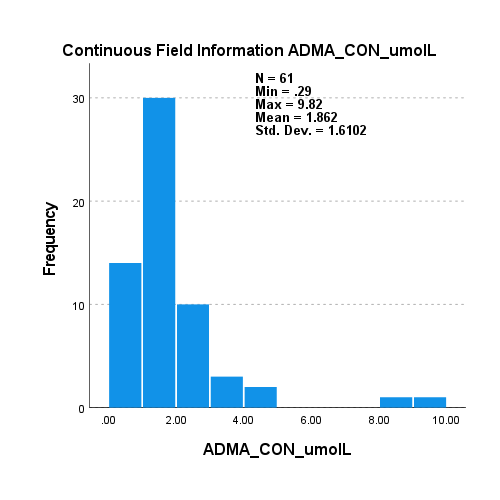


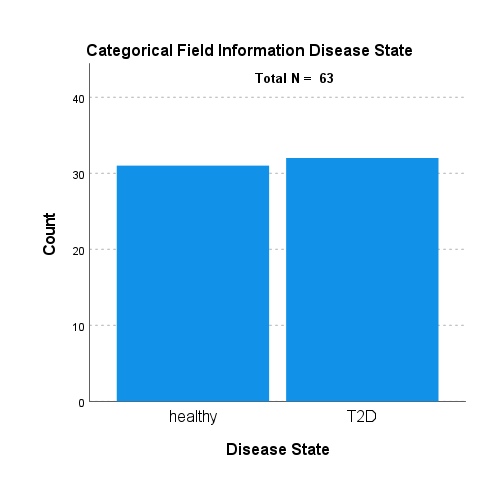

Supplement: Supplementary file 2 [file j_dmpt-2021-0135_suppl_002.docx]
